# Supplementary material for: Magnetic field responsive microspheres with tunable structural colors by controlled assembly of nanoparticles
Source: Royal Society of Chemistry journal article supplement (doi:10.1039/d1ra09028c), 2022-01-01
Supplement: d1ra09028c1.pdf [file d1ra09028c1.pdf]

## Supporting information

### Magnetic field responsive microspheres with tunable structural colors by controlled assembly of nanoparticles

Shenglong Shang, <sup>\*a, b</sup> Kaiqi Zhang, <sup>a</sup> Huifang Hu, <sup>a</sup> Xiaoran Sun, <sup>c</sup> Jie Liu, <sup>a</sup> Yanpeng Ni, <sup>a</sup>  
Ping Zhu <sup>a</sup>

<sup>a</sup> Institute of Functional Textiles and Advanced Materials, College of Textiles & Clothing, State Key Laboratory of Bio-Fibers and Eco-Textiles, Qingdao University, Qingdao 266071, China.

<sup>b</sup> State Key Laboratory for Modification of Chemical Fibers and Polymer Materials, College of Materials Science and Engineering, Donghua University, Shanghai 201620, China.

<sup>c</sup> Chinesisch-Deutsche Fakultät für Ingenieurwissenschaft, Qingdao University of Science & Technology, Qingdao 266599, China.

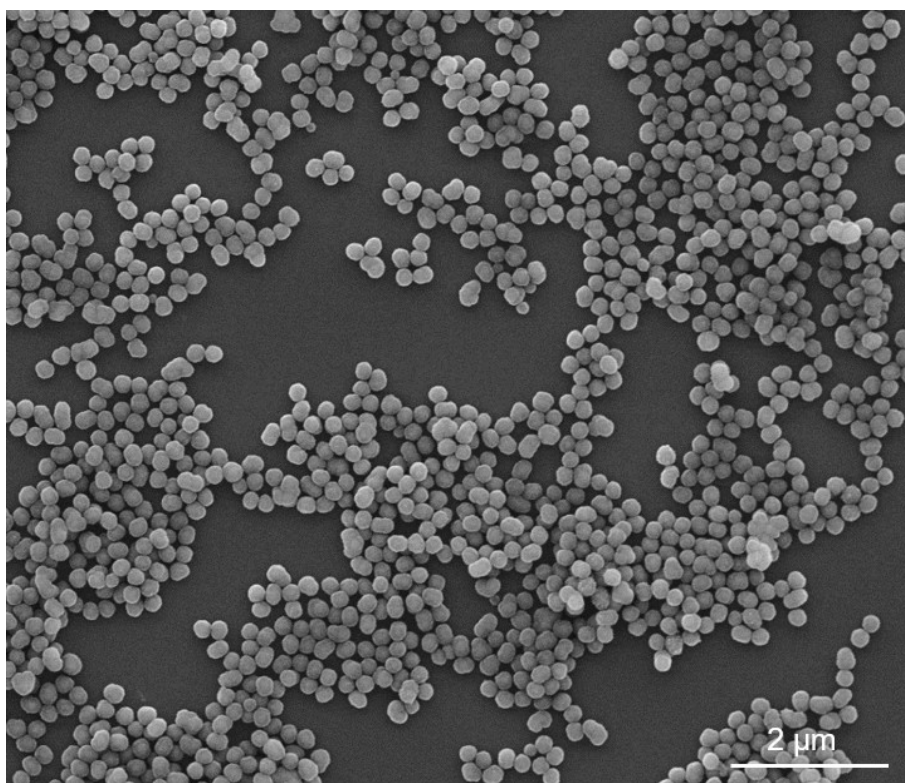

Figure S1 SEM image of  $\text{Fe}_3\text{O}_4@\text{C}$  nanoparticles.

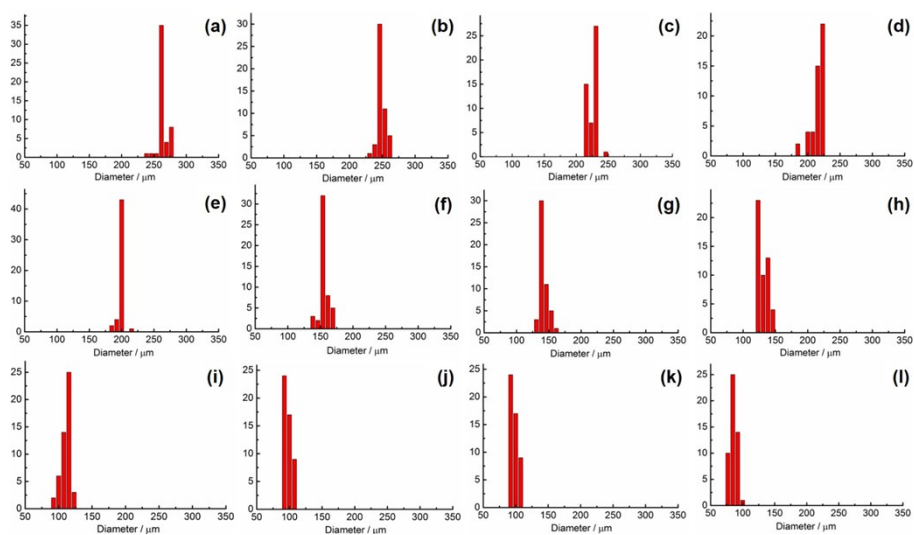

Figure S2 Size distributions of the microspheres fabricated at the flow rates of (a) 300  $\mu\text{L/h}$ , (b) 250  $\mu\text{L/h}$ , (c) 200  $\mu\text{L/h}$ , (d) 150  $\mu\text{L/h}$ , (e) 100  $\mu\text{L/h}$ , (f) 90  $\mu\text{L/h}$ , (g) 80  $\mu\text{L/h}$ , (h) 70  $\mu\text{L/h}$ , (i) 60  $\mu\text{L/h}$ , (j) 50  $\mu\text{L/h}$  (k) 40  $\mu\text{L/h}$ , (l) 30  $\mu\text{L/h}$ .

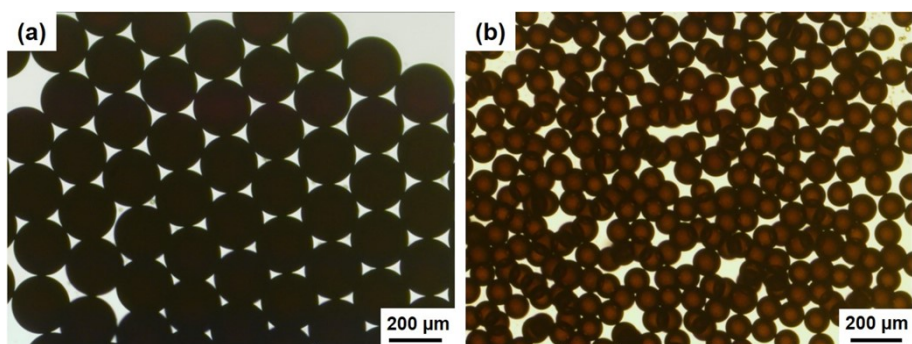

Figure S3 Optical macroscope image of the microspheres fabricated at the flow rates of (a) 200  $\mu\text{L/h}$ , (b) 50  $\mu\text{L/h}$ , the average diameters of the spheres are 231  $\mu\text{m}$  (a) and 100  $\mu\text{m}$  (b).

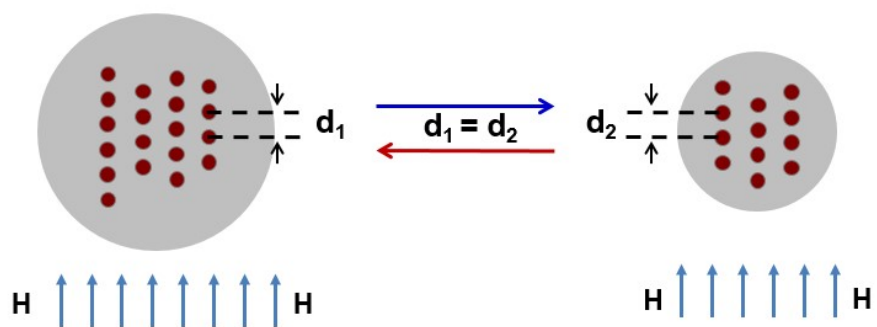

Figure S4 The mechanism of the microspheres with different sizes display color.

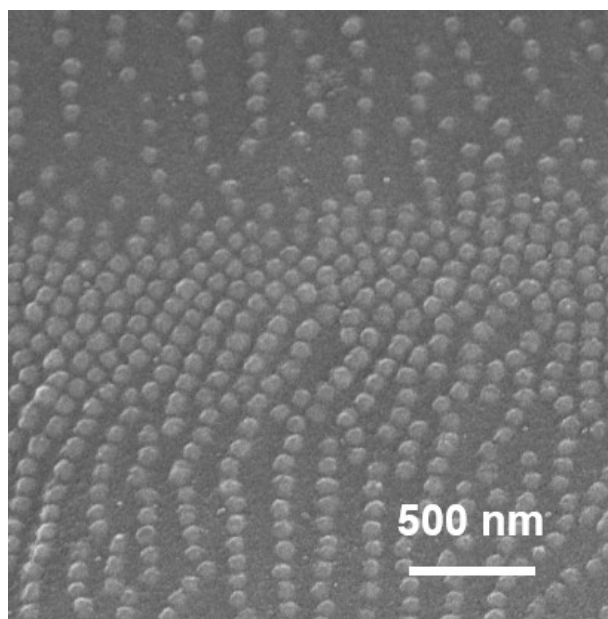

Figure S5 Cross-sectional SEM image of microspheres polymerized under magnetic field.

Video S1 A video of the dynamic color changing of PVA film under a magnet.
